# Supplementary material for: Cytotoxicity of Biodegradable Zinc and Its Alloys: A Systematic Review
Source: MDPI journal article supplement (doi:10.3390/jfb14040206), 2023-04-07
Supplement: s1 [file s1]

**Table S1.** Electronic database and search strategy. (28/09/2022)

|                                                                                                           |                                                                                                                                                                                                                                                                                                                                                                                         |                                                                                                                                                                                                                                                                                                                                                                                                                                                                                                    |
|-----------------------------------------------------------------------------------------------------------|-----------------------------------------------------------------------------------------------------------------------------------------------------------------------------------------------------------------------------------------------------------------------------------------------------------------------------------------------------------------------------------------|----------------------------------------------------------------------------------------------------------------------------------------------------------------------------------------------------------------------------------------------------------------------------------------------------------------------------------------------------------------------------------------------------------------------------------------------------------------------------------------------------|
| <b>PubMed</b>                                                                                             |                                                                                                                                                                                                                                                                                                                                                                                         |                                                                                                                                                                                                                                                                                                                                                                                                                                                                                                    |
| #1 (zinc[MeSH Terms] OR Zn[Title/Abstract] OR Zn alloy[Title/Abstract] OR Zn-based alloy[Title/Abstract]) | #2 (biodegradable metal[Title/Abstract] OR degradable metal[Title/Abstract] OR biodegradable[Title/Abstract] OR degradable[Title/Abstract] OR absorbable[Title/Abstract] OR biodegradable implant*[Title/Abstract] OR biodegradable fixation[Title/Abstract] OR absorbable implant*[Title/Abstract] OR bioabsorbable implant*[Title/Abstract] OR biodegrading implant*[Title/Abstract]) | #3 (toxicity tests[MeSH Terms] OR cytotoxicity[Title/Abstract] OR cytocompatibility[Title/Abstract] OR toxicity test*[Title/Abstract] OR mutagenicity tests[MeSH Terms] OR genotoxicity test*[Title/Abstract] OR genotoxic effect*[Title/Abstract] OR genotoxicity[Title/Abstract] OR biocompatible materials[MeSH Terms] OR biomaterial*[Title/Abstract] OR cell culture techniques[MeSH Terms] OR cell culture*[Title/Abstract] OR cell survival[MeSH Terms] OR cell viability*[Title/Abstract]) |
| #1 AND #2 AND #3                                                                                          |                                                                                                                                                                                                                                                                                                                                                                                         |                                                                                                                                                                                                                                                                                                                                                                                                                                                                                                    |
| <b>Scopus</b>                                                                                             |                                                                                                                                                                                                                                                                                                                                                                                         |                                                                                                                                                                                                                                                                                                                                                                                                                                                                                                    |
| #1 (TITLE-ABS-KEY ((zinc OR Zn OR "Zn alloy" OR "Zn-based alloy")))                                       | #2 (TITLE-ABS-KEY (("biodegradable metal" OR "degradable metal" OR biodegradable OR degradable OR absorbable OR "biodegradable implant*" OR "biodegradable fixation" OR "absorbable implant*" OR "bioabsorbable implant*" OR "biodegrading implant*")))                                                                                                                                 | #3 (TITLE-ABS-KEY ((cytotoxicity OR cytocompatibility OR "toxicity test" OR "genotoxicity test" OR "genotoxic effect" OR genotoxicity OR biomaterial OR "cell culture" OR "cell viability")))                                                                                                                                                                                                                                                                                                      |
| #1 AND #2 AND #3                                                                                          |                                                                                                                                                                                                                                                                                                                                                                                         |                                                                                                                                                                                                                                                                                                                                                                                                                                                                                                    |
| <b>Web Of Science</b>                                                                                     |                                                                                                                                                                                                                                                                                                                                                                                         |                                                                                                                                                                                                                                                                                                                                                                                                                                                                                                    |
| #1 TS= (zinc OR Zn OR "Zn alloy" OR "Zn-based alloy")                                                     | #2 TS= ("biodegradable metal" OR "degradable metal" OR biodegradable OR degradable OR absorbable OR "biodegradable implant*" OR "biodegradable fixation" OR "absorbable implant*" OR "bioabsorbable implant*" OR "biodegrading implant*")                                                                                                                                               | #3 TS= (cytotoxicity OR cytocompatibility OR "toxicity test" OR "genotoxicity test" OR "genotoxic effect" OR genotoxicity OR "biomaterial" OR "cell culture" OR "cell viability")                                                                                                                                                                                                                                                                                                                  |
| #1 AND #2 AND #3                                                                                          |                                                                                                                                                                                                                                                                                                                                                                                         |                                                                                                                                                                                                                                                                                                                                                                                                                                                                                                    |
